# Supplementary material for: The Influence of Herbicides to Marine Organisms Aliivibrio fischeri and Artemia salina
Source: MDPI journal article supplement (doi:10.3390/toxics9110275), 2021-10-21
Supplement: s1 [file s1]

# Supplementary Materials: The Influence of Herbicides to Marine Organisms *Aliivibrio fischeri* and *Artemia salina*

Radek Vurm, Lucia Tajnaiová and Jana Kofroňová

## 1. Tested concentrations

**Table S1.** Luminiscent bacteria test. Tested concentrations of herbicides and active substances.

|                   |                      | Tested concentrations ( $\mu\text{g.l}^{-1}$ )               |
|-------------------|----------------------|--------------------------------------------------------------|
| Herbicides        | Roundup® Classic Pro | 500; 400; 350; 300; 250; 200                                 |
|                   | Kaput® Premium       | 6000; 5000; 4000; 3000; 2500; 2000; 1000                     |
|                   | Banvel® 480 S        | 10,000; 8750; 7500; 6250; 5000; 3750; 2500; 2000; 1500; 1000 |
|                   | Lontrel 300          | 40,000; 30,000; 20,000; 10,000; 7500; 5000; 2500             |
|                   | Finalsan®            | 750; 500; 300; 100; 70; 37.5; 10                             |
| Active substances | glyphosate           | 30,000; 25,000; 21,000; 14,000; 9000; 3500                   |
|                   | dicamba              | 39,500; 34,500; 26,000; 19,500; 9500; 5000                   |
|                   | clopyralid           | 31,000; 25,000; 19,500; 14,500; 9500; 5000                   |
|                   | nonanoic acid        | 75,000; 50,000; 25,000; 17,500; 10,000; 5000                 |

**Table S2.** Crustacea bioassay test. Tested concentrations of herbicides and active substances.

|                   |                      | Tested concentrations ( $\mu\text{g.l}^{-1}$ ) |
|-------------------|----------------------|------------------------------------------------|
| Herbicides        | Roundup® Classic Pro | 50; 28; 22; 18; 14                             |
|                   | Kaput® Premium       | 40; 30; 20; 15; 10                             |
|                   | Banvel® 480 S        | 5000; 3700; 2500; 2000; 500                    |
|                   | Lontrel 300          | 5000; 3000; 2000; 1500; 1000; 500              |
|                   | Finalsan®            | 1000; 300; 100; 70; 37; 10                     |
| Active substances | glyphosate           | 2000; 1000; 800; 600; 500                      |
|                   | dicamba              | 7500; 5000; 4500; 4000; 2000                   |
|                   | clopyralid           | 3000; 2800; 2600; 2500; 2000                   |
|                   | nonanoic acid        | 10,000; 9000; 7500; 7000; 6000; 5000           |

## 2. Curve fitting and probit curve fitting values.

**Table S3.** Tested organism *A. fischeri*.

| Tested substances    | Time (min) | Curve fitting |           |                 |        |                              |    | Probit curve fitting |        |           |                |
|----------------------|------------|---------------|-----------|-----------------|--------|------------------------------|----|----------------------|--------|-----------|----------------|
|                      |            | Slope         | Intercept | SD ( $\sigma$ ) | SE     | Chi-test ( $\chi^2$ )<br>Sig | df | R <sup>2</sup>       | Slope  | Intercept | R <sup>2</sup> |
| Roundup® Classic Pro | 15         | 4.0505        | −4.6163   | 0.2469          | 0.0438 | 0.9637                       | 4  | 0.9416               | 4.0050 | −4.5085   | 0.9391         |
|                      | 30         | 4.5889        | −5.9460   | 0.2179          | 0.0392 | 0.9043                       | 4  | 0.9252               | 4.5137 | −5.7680   | 0.9210         |
| Kaput® Premium       | 15         | 2.7016        | −4.1691   | 0.3701          | 0.0601 | 0.9585                       | 5  | 0.9760               | 2.6821 | −4.1020   | 0.9764         |
|                      | 30         | 2.8386        | −4.6922   | 0.3523          | 0.0575 | 0.9851                       | 5  | 0.9809               | 2.8198 | −4.6288   | 0.9818         |
| Banvel® 480 S        | 15         | 1.7341        | −0.9325   | 0.5767          | 0.0774 | 1.0000                       | 8  | 0.9955               | 1.7334 | −0.9302   | 0.9955         |
|                      | 30         | 1.8047        | −1.0626   | 0.5541          | 0.0757 | 1.0000                       | 8  | 0.9945               | 1.8029 | −1.0561   | 0.9946         |
| Lontrel 300          | 15         | 1.8160        | −2.0479   | 0.5507          | 0.0916 | 0.9852                       | 5  | 0.9890               | 1.8110 | −2.0278   | 0.9890         |
|                      | 30         | 2.0445        | −3.0597   | 0.4891          | 0.0827 | 0.9672                       | 5  | 0.9892               | 2.0379 | −3.0324   | 0.9890         |
| Finalsan®            | 15         | 1.0444        | 3.1081    | 0.9574          | 0.1559 | 0.9833                       | 5  | 0.9876               | 1.0423 | 3.1130    | 0.9877         |
|                      | 30         | 0.9349        | 3.2957    | 1.0696          | 0.1713 | 0.9989                       | 5  | 0.9943               | 0.9338 | 3.2980    | 0.9943         |
| glyphosate           | 15         | 1.0363        | 0.9599    | 0.9650          | 0.1610 | 0.8902                       | 4  | 0.8020               | 1.0156 | 1.0396    | 0.8079         |

|               |    |        |         |        |        |        |   |        |        |         |        |
|---------------|----|--------|---------|--------|--------|--------|---|--------|--------|---------|--------|
| dicamba       | 30 | 1.1444 | 1.0217  | 0.8738 | 0.1602 | 0.9566 | 4 | 0.7748 | 1.1031 | 1.1761  | 0.7924 |
|               | 15 | 1.7585 | −2.3871 | 0.5687 | 0.0974 | 0.8803 | 4 | 0.9361 | 1.7381 | −2.3044 | 0.9392 |
| clopyralid    | 30 | 1.5620 | −1.1908 | 0.6402 | 0.1122 | 0.9183 | 4 | 0.8736 | 1.5253 | −1.0476 | 0.8742 |
|               | 15 | 1.7315 | −1.9565 | 0.5775 | 0.0983 | 0.8501 | 4 | 0.9004 | 1.7019 | −1.8379 | 0.9030 |
| nonanoic acid | 30 | 1.7142 | −1.3675 | 0.5834 | 0.1085 | 0.9727 | 4 | 0.8174 | 1.6263 | −1.0258 | 0.8341 |
|               | 15 | 1.1107 | 0.3295  | 0.9004 | 0.1513 | 0.9897 | 4 | 0.9820 | 1.1102 | 0.3315  | 0.9821 |
|               | 30 | 1.2078 | −0.0095 | 0.8280 | 0.1406 | 0.9089 | 4 | 0.9532 | 1.2024 | 0.0132  | 0.9533 |

SD: standard deviation, SE: standard error, Chi-test: Chi-Square test, df: degree of freedom.

**Table S4.** Tested organism *A. salina*.

| Tested substances    | Curve fitting |           |        |        |                | Probit curve fitting              |    |         |           |                |
|----------------------|---------------|-----------|--------|--------|----------------|-----------------------------------|----|---------|-----------|----------------|
|                      | Slope         | Intercept | SD (σ) | SE     | R <sup>2</sup> | Chi-test (χ <sup>2</sup> )<br>Sig | df | Slope   | Intercept | R <sup>2</sup> |
| Roundup® Classic Pro | 7.0390        | −3.9130   | 0.1420 | 0.0310 | 0.9999         | 1.0000                            | 2  | 7.0392  | −3.9129   | 0.9980         |
| Kaput® Premium       | 6.5443        | −3.5099   | 0.1528 | 0.0361 | 0.9893         | 0.9676                            | 2  | 6.5128  | −3.4709   | 0.9881         |
| Banvel® 480 S        | 4.8253        | −11.4114  | 0.2072 | 0.0421 | 0.9514         | 0.9221                            | 2  | 4.7823  | −11.2659  | 0.9699         |
| Lontrel 300          | 2.5485        | −3.2962   | 0.3924 | 0.0709 | 0.9612         | 0.9715                            | 3  | 2.5263  | −3.2214   | 0.9535         |
| Finalsan®            | 1.6313        | 1.7147    | 0.6130 | 0.1169 | 0.8877         | 0.8396                            | 4  | 1.5784  | 1.8425    | 0.8983         |
| glyphosate           | 11.2942       | −27.8573  | 0.0885 | 0.0236 | 0.9099         | 0.4585                            | 1  | 11.0164 | −27.0468  | 0.9889         |
| dicamba              | 3.5048        | −7.5046   | 0.2853 | 0.0626 | 0.9557         | 0.4448                            | 2  | 3.4912  | −7.4596   | 0.9381         |
| clopyralid           | 9.8481        | −28.9533  | 0.1015 | 0.0194 | 0.7701         | 0.9090                            | 3  | 9.6924  | −28.4121  | 0.7948         |
| nonanoic acid        | 5.9059        | −17.8837  | 0.1693 | 0.0292 | 0.8751         | 0.7836                            | 1  | 5.7527  | −17.2902  | 0.8775         |

SD: standard deviation, SE: standard error, Chi-test: Chi-Square test, df: degree of freedom
